# Supplementary material for: An automated NMR platform with light-coupled cryogenic probes to detect low micromolar samples
Source: Copernicus journal article supplement (doi:10.5194/mr-2024-3), 2024-02-12
Supplement: Supplementary file [file mr-2024-3-RC1-supplement.pdf]

## **An automated NMR platform with light-coupled cryogenic probes to detect low micromolar samples**

**Wüster, Gebbers, Renn, Bütikofer, Riek, and Torres**

Nice work. Well written manuscript. Should be published with the following corrections.

Figure 1 caption, last line: “function of lateral axial distance”?

Line 108: “the insertion of the optic fiber has no impact on the field homogeneity caused by inserting an optical fiber” – unnecessary repetition.

Line 137: Figure 3 (not 2).

Line 141 and elsewhere: the author of the article referred to as “In Bonn, 1954” is August Beer (of the Beer-Lambert Law) working at the University of Bonn.

Line 154: define the STD abbreviation

Line 174: sphericall bottom?

Line 204: shouldn't KPO<sub>4</sub> be K<sub>3</sub>PO<sub>4</sub> or K<sub>2</sub>HPO<sub>4</sub> or KH<sub>2</sub>PO<sub>4</sub>?

The list of references has been carelessly compiled: missing page numbers, incomplete author lists, acronyms in sentence case, “in Bonn, B”.

And in the *Supplementary Information*

Page 1: the title doesn't match that of the main text.

Figure S2: “a 3mm NMR tube with lensed bottom with lensed bottom” – too many bottoms.

Figure S2: The labelling of the figure would be easier to read if it were higher resolution.

Figure S3: At first glance, there appears to be very little difference between the three photographs. Is that the point? It would be helpful if the caption could explain things a bit more.
